# Supplementary material for: Where is the unpaired electron density? A combined experimental and theoretical finding on the geometric and electronic structures of the Co(iii) and Mn(iv) complexes of the unsymmetrical non-innocent pincer ONS ligand
Source: Royal Society of Chemistry journal article supplement (doi:10.1039/d2dt01868c), 2022-01-01
Supplement: d2dt01868c1.pdf [file d2dt01868c1.pdf]

## Supporting Information

### **Where is the Unpaired-Electron Density? A Combined Experimental and Theoretical Finding on Geometric and Electronic Structures of Co(III) and Mn(IV) Complexes of Unsymmetrical Non-innocent Pincer ONS Ligand**

Prasenjit Sarkar<sup>a</sup>, Amrit Sarmah<sup>b,c</sup> and Chandan Mukherjee<sup>\*a</sup>

| <b>Contents</b>                                                                     | <b>Page</b> |
|-------------------------------------------------------------------------------------|-------------|
| Infrared spectrum of complex <b>1</b>                                               | S3          |
| ESI (+ve) mass spectra for complex <b>1</b>                                         | S3          |
| Infrared spectrum of complex <b>2</b>                                               | S4          |
| ESI (+ve) mass spectra for complex <b>2</b>                                         | S4          |
| Selected bond distances (Å) and bond angles (°) for complex <b>1</b>                | S5          |
| Selected bond distances (Å) and bond angles (°) for complex <b>2</b>                | S6          |
| Crystallographic parameters and refinement data for complex <b>1</b>                | S7          |
| Crystallographic parameters and refinement data for complex <b>2</b>                | S8          |
| Showing intermolecular interaction of complex <b>1</b> at 100 K crystal lattice     | S9          |
| Optimized bond distances of complex <b>1</b> and complex <b>2</b>                   | S9          |
| Possible different spin states of the composition [IV]                              | S10         |
| Doublet and quartet spin density maps of complex <b>1</b>                           | S10         |
| Optimized coordinates of complex <b>1</b>                                           | S10         |
| Optimized coordinates of complex <b>2</b>                                           | S12         |
| Mulliken charges (I) and spin densities (II) of complex <b>1</b> for doublet state. | S15         |
| Mulliken charges (I) and spin densities (II) of complex <b>1</b> for quartet state. | S16         |

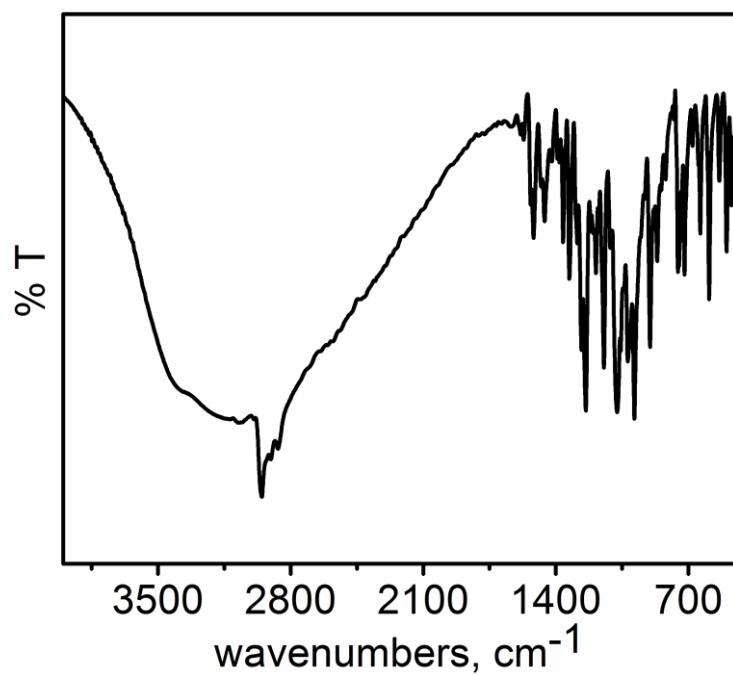

**Figure S1.** Infrared spectrum of complex **1**.

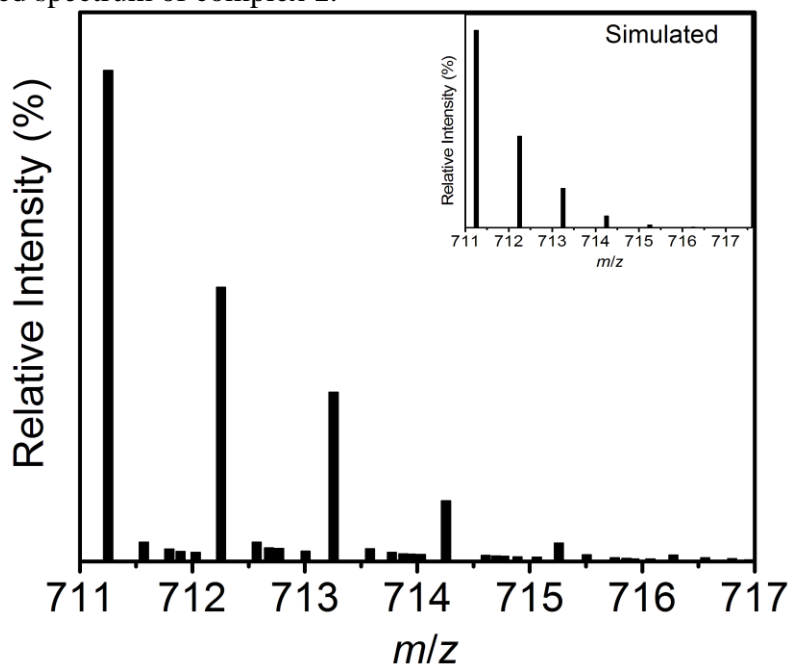

**Figure S2.** Experimental and simulated mass spectra for complex **1** =  $[\text{C}_{40}\text{H}_{48}\text{N}_2\text{O}_2\text{S}_2\text{Co}]^+$  have been shown.

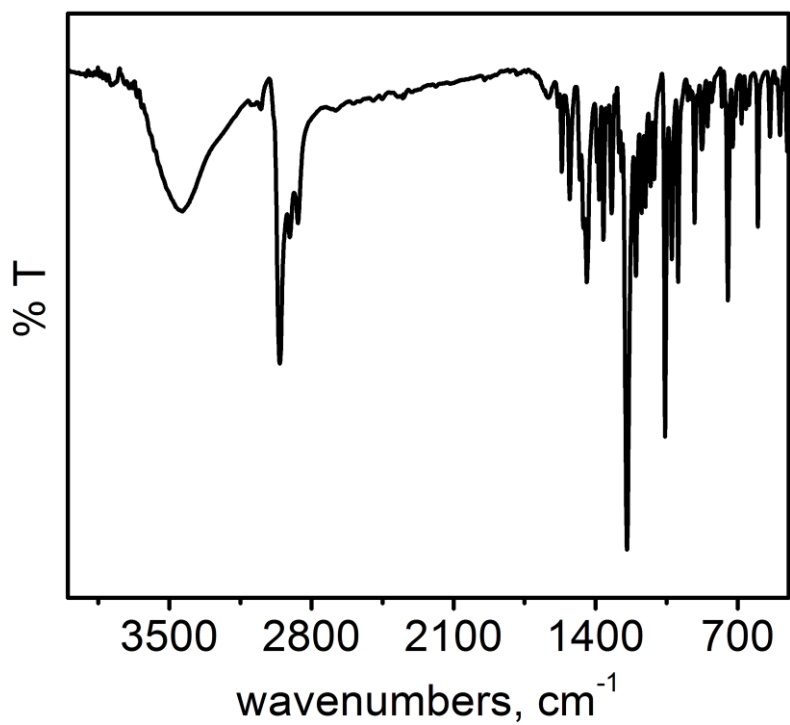

**Figure S3.** Infrared spectrum of complex **2**.

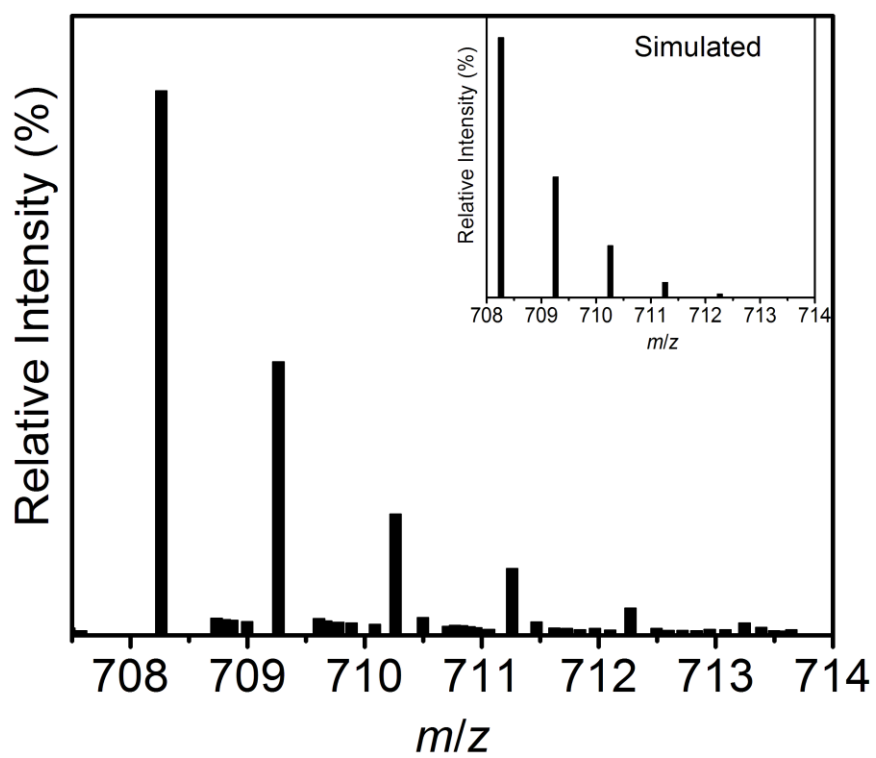

**Figure S4:** Experimental and simulated mass spectra for complex **2** =  $[\text{C}_{40}\text{H}_{48}\text{N}_2\text{O}_2\text{S}_2\text{Mn} + \text{H}]^+$  have been shown.

**Table S1:** Selected bond distances (Å) and bond angles (°) for complex **1**.

|            |            |            |            |
|------------|------------|------------|------------|
| Co1–N1     | 1.863(2)   | C1–C6      | 1.413(4)   |
| Co1–N2     | 1.870(2)   | C15–C16    | 1.408(4)   |
| Co1–O1     | 1.9532(19) | C16–C17    | 1.361(4)   |
| Co1–O2     | 1.9386(18) | C17–C18    | 1.392(4)   |
| Co1–S1     | 2.2188(8)  | C19–C18    | 1.368(4)   |
| Co1–S2     | 2.2071(8)  | C20–C19    | 1.394(4)   |
| N1–C1      | 1.354(3)   | C20–C15    | 1.405(4)   |
| N1–C15     | 1.392(3)   | C21–C22    | 1.430(4)   |
| N2–C21     | 1.353(3)   | C22–C23    | 1.422(4)   |
| N2–C35     | 1.393(3)   | C24–C23    | 1.384(5)   |
| O1–C2      | 1.288(3)   | C25–C24    | 1.415(6)   |
| O2–C22     | 1.298(3)   | C25–C26    | 1.363(5)   |
| S1–C20     | 1.741(3)   | C26–C21    | 1.408(4)   |
| S2–C36     | 1.746(3)   | C36–C35    | 1.393(4)   |
| C1–C2      | 1.457(4)   | C36–C37    | 1.394(5)   |
| C2–C3      | 1.428(4)   | C38–C37    | 1.380(5)   |
| C4–C3      | 1.362(4)   | C38–C39    | 1.368(5)   |
| C4–C5      | 1.428(4)   | C39–C40    | 1.370(5)   |
| C5–C6      | 1.350(4)   | C35–C40    | 1.411(4)   |
|            |            |            |            |
| N1–Co1–N2  | 172.42(10) | O1–Co1–S1  | 171.47(6)  |
| N1–Co1–O2  | 93.76(8)   | N1–Co1–S2  | 93.48(7)   |
| N2–Co1–O2  | 84.48(8)   | N2–Co1–S2  | 88.21(7)   |
| N1–Co1–O1  | 84.08(9)   | O2–Co1–S2  | 172.69(6)  |
| N2–Co1–O1  | 88.43(8)   | O1–Co1–S2  | 94.20(6)   |
| O2–Co1–O1  | 85.54(8)   | S1–Co1–S2  | 89.65(3)   |
| N1–Co1–S1  | 88.10(7)   | O2–Co1–S1  | 91.60(6)   |
| N2–Co1–S1  | 99.30(7)   | C36–S2–Co1 | 108.21(16) |
| C20–S1–Co1 | 95.12(10)  |            |            |

**Table S2:** Selected bond distances (Å) and bond angles (°) for complex **2**.

|            |            |            |           |
|------------|------------|------------|-----------|
| Mn1–N1     | 1.926(2)   | C1–C6      | 1.413(4)  |
| Mn1–N2     | 1.918(2)   | C15–C16    | 1.408(4)  |
| Mn1–O1     | 1.9419(18) | C16–C17    | 1.361(4)  |
| Mn1–O2     | 1.9523(19) | C17–C18    | 1.392(4)  |
| Mn1–S1     | 2.2713(8)  | C19–C18    | 1.368(4)  |
| Mn1–S2     | 2.2721(9)  | C20–C19    | 1.394(4)  |
| N1–C1      | 1.370(3)   | C20–C15    | 1.405(3)  |
| N1–C15     | 1.401(3)   | C21–C22    | 1.430(4)  |
| N2–C21     | 1.368(4)   | C22–C23    | 1.422(4)  |
| N2–C35     | 1.397(4)   | C24–C23    | 1.384(5)  |
| O1–C2      | 1.303(3)   | C25–C24    | 1.415(6)  |
| O2–C22     | 1.298(3)   | C25–C26    | 1.363(5)  |
| S1–C20     | 1.740(3)   | C26–C21    | 1.408(4)  |
| S2–C36     | 1.744(3)   | C36–C35    | 1.393(4)  |
| C1–C2      | 1.430(4)   | C36–C37    | 1.397(5)  |
| C2–C3      | 1.428(4)   | C38–C37    | 1.380(5)  |
| C4–C3      | 1.362(4)   | C38–C39    | 1.368(5)  |
| C4–C5      | 1.428(4)   | C39–C40    | 1.370(5)  |
| C5–C6      | 1.350(4)   | C35–C40    | 1.411(4)  |
|            |            |            |           |
| N1–Mn1–N2  | 173.15(9)  | O1–Mn1–S1  | 163.93(6) |
| N1–Mn1–O2  | 104.48(9)  | N1–Mn1–S2  | 90.51(7)  |
| N2–Mn1–O2  | 80.98(9)   | N2–Mn1–S2  | 84.39(8)  |
| N1–Mn1–O1  | 81.04(8)   | O2–Mn1–S2  | 164.45(6) |
| N2–Mn1–O1  | 103.63(8)  | O1–Mn1–S2  | 91.73(7)  |
| O2–Mn1–O1  | 86.65(8)   | S1–Mn1–S2  | 95.20(3)  |
| N1–Mn1–S1  | 84.41(6)   | O2–Mn1–S1  | 90.43(6)  |
| N2–Mn1–S1  | 91.48(7)   | C36–S2–Mn1 | 96.97(11) |
| C20–S1–Mn1 | 97.11(9)   |            |           |

**Table S3:** Crystallographic parameters and refinement data for complex **1**.

---

|                                                   |                                                                                                                                                          |
|---------------------------------------------------|----------------------------------------------------------------------------------------------------------------------------------------------------------|
| Empirical formula                                 | C40 H48 N2 O2 S2 Co                                                                                                                                      |
| Formula weight                                    | 711.85                                                                                                                                                   |
| CCDC Number                                       | 2178435                                                                                                                                                  |
| Crystal habit, colour                             | Block, violet                                                                                                                                            |
| Crystal size, mm <sup>3</sup>                     | 0.33 × 0.31 × 0.28                                                                                                                                       |
| Temperature, <i>T</i>                             | 100.01(11)                                                                                                                                               |
| Wavelength, $\lambda$ (Å)                         | 0.71073                                                                                                                                                  |
| Crystal system                                    | triclinic                                                                                                                                                |
| Space group                                       | 'P -1'                                                                                                                                                   |
| Unit cell dimensions                              | $a = 10.2996(5)$ Å<br>$b = 13.3878(8)$ Å<br>$c = 13.7436(8)$ Å<br>$\alpha = 85.804(5)^\circ$ , $\beta = 83.910(4)^\circ$<br>$\gamma = 80.738(5)^\circ$ , |
| Volume, $V$ (Å <sup>3</sup> )                     | 1856.79(18)                                                                                                                                              |
| <i>Z</i>                                          | 2                                                                                                                                                        |
| Calculated density, Mg·m <sup>-3</sup>            | 1.273                                                                                                                                                    |
| Absorption coefficient, $\mu$ (mm <sup>-1</sup> ) | 0.611                                                                                                                                                    |
| $F(000)$                                          | 754                                                                                                                                                      |
| $\theta$ range for data collection                | 2.4930° to 28.4220°                                                                                                                                      |
| Limiting indices                                  | $-11 \leq h \leq 12$ , $-15 \leq k \leq 15$ ,<br>$-16 \leq l \leq 12$                                                                                    |
| Reflection collected/unique                       | 13882/6538 [ $R(\text{int}) = 0.0406$ ]                                                                                                                  |
| Completeness to $\theta$                          | 99.9% ( $\theta = 25.00^\circ$ )                                                                                                                         |
| Max. and min. transmission                        | 1.0000/0.807                                                                                                                                             |
| Refinement method                                 | 'SHELXL-2018/3 (Sheldrick, 2018)'                                                                                                                        |
| Data/restraints/parameters                        | 6538/0/436                                                                                                                                               |
| Goodness-of-fit on $F^2$                          | 1.050                                                                                                                                                    |
| Final $R$ indices [ $I > 2\sigma(I)$ ]            | $R1 = 0.0439$ , $wR2 = 0.1093$                                                                                                                           |
| $R$ indices (all data)                            | $R1 = 0.0548$ , $wR2 = 0.1187$                                                                                                                           |
| Largest diff. peak and hole                       | 0.88 and $-0.46$ e·Å <sup>-3</sup>                                                                                                                       |

---

**Table S4:** Crystallographic parameters and refinement data for complex **2**.

---

|                                                   |                                                                                                                                                    |
|---------------------------------------------------|----------------------------------------------------------------------------------------------------------------------------------------------------|
| Empirical formula                                 | C40 H48 N2 O2 S2 Mn                                                                                                                                |
| Formula weight                                    | 707.86                                                                                                                                             |
| CCDC Number                                       | 2178436                                                                                                                                            |
| Crystal habit, colour                             | Block, green                                                                                                                                       |
| Crystal size, mm <sup>3</sup>                     | 0.35 × 0.31 × 0.28                                                                                                                                 |
| Temperature, <i>T</i>                             | 293(2)                                                                                                                                             |
| Wavelength, $\lambda$ (Å)                         | 0.71073                                                                                                                                            |
| Crystal system                                    | monoclinic                                                                                                                                         |
| Space group                                       | 'P 21/c'                                                                                                                                           |
| Unit cell dimensions                              | $a = 21.3127(10)$ Å<br>$b = 18.3726(8)$ Å<br>$c = 10.8905(5)$ Å<br>$\alpha = 90.00^\circ$ , $\beta = 103.952(4)^\circ$<br>$\gamma = 90.00^\circ$ , |
| Volume, $V$ (Å <sup>3</sup> )                     | 4138.6(3)                                                                                                                                          |
| <i>Z</i>                                          | 4                                                                                                                                                  |
| Calculated density, Mg·m <sup>-3</sup>            | 1.136                                                                                                                                              |
| Absorption coefficient, $\mu$ (mm <sup>-1</sup> ) | 0.452                                                                                                                                              |
| $F(000)$                                          | 1500                                                                                                                                               |
| $\theta$ range for data collection                | 2.938° to 24.997°                                                                                                                                  |
| Limiting indices                                  | $-22 \leq h \leq 25$ , $-21 \leq k \leq 19$ ,<br>$-12 \leq l \leq 12$                                                                              |
| Reflection collected/unique                       | 20446/7267 [ $R(\text{int}) = 0.0387$ ]                                                                                                            |
| Completeness to $\theta$                          | 99.8% ( $\theta = 25.00^\circ$ )                                                                                                                   |
| Max. and min. transmission                        | 1.0000/0.44486                                                                                                                                     |
| Refinement method                                 | 'SHELXL-2018/3 (Sheldrick, 2018)'                                                                                                                  |
| Data/restraints/parameters                        | 7267/471/452                                                                                                                                       |
| Goodness-of-fit on $F^2$                          | 1.043                                                                                                                                              |
| Final $R$ indices [ $I > 2\sigma(I)$ ]            | $R1 = 0.0492$ , $wR2 = 0.1220$                                                                                                                     |
| $R$ indices (all data)                            | $R1 = 0.0669$ , $wR2 = 0.1305$                                                                                                                     |
| Largest diff. peak and hole                       | 0.27 and $-0.32$ e·Å <sup>-3</sup>                                                                                                                 |

---



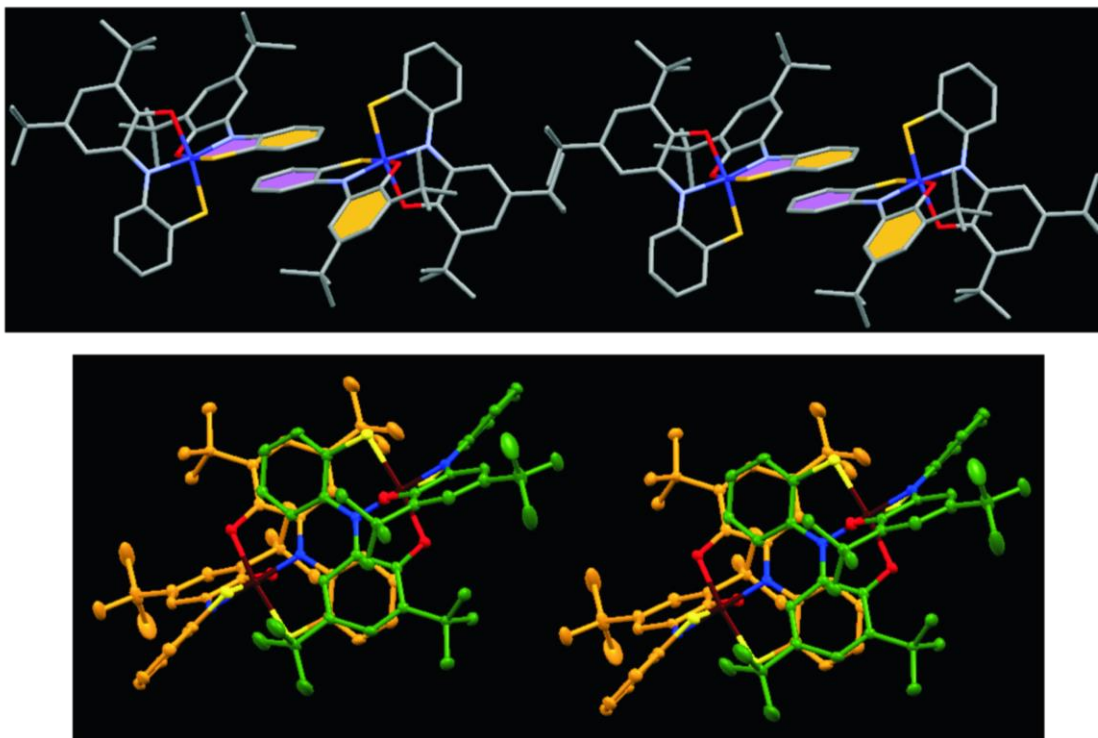

**Figure S5:** Showing intermolecular interaction of complex **1** at 100 K crystal lattice.

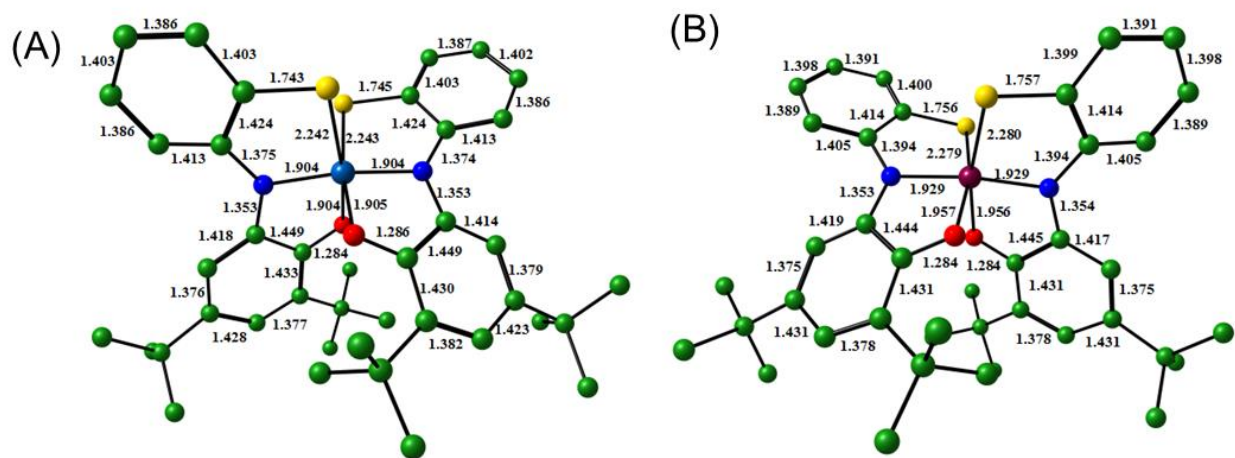

**Figure S6:** Optimized bond distances of (A) complex **1** and (B) complex **2**.

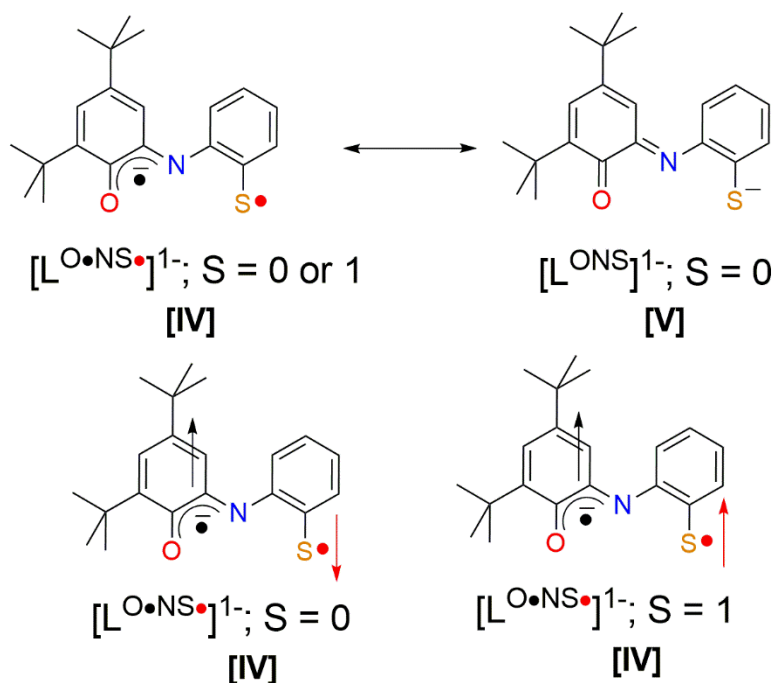

**Figure S8:** Possible different spin states of the composition [IV].

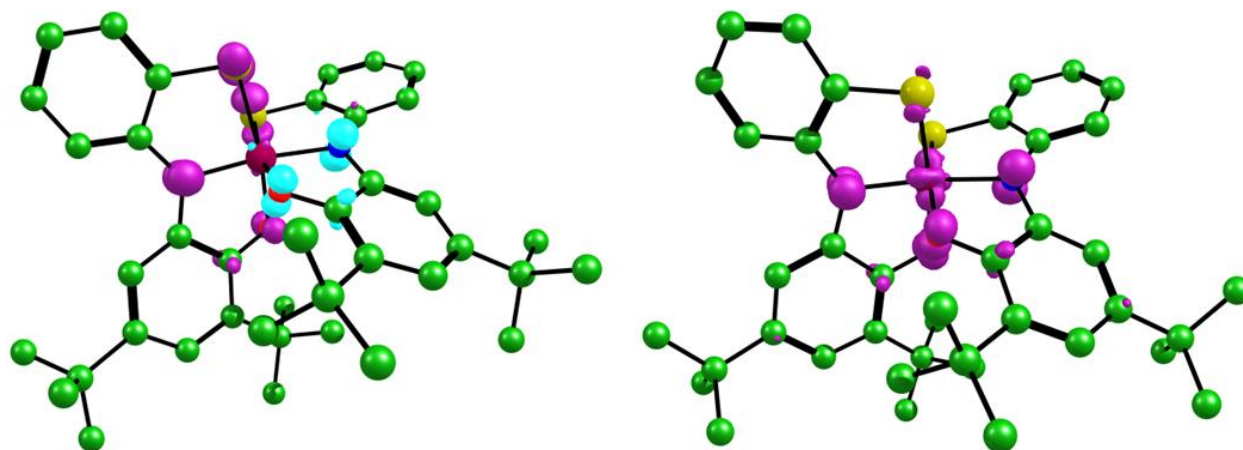

**Figure S8:** Doublet (left) and quartet(right) spin density maps of complex **1**. (positive electron density = purple and negative electron density = blue)

**Table S5:** Optimized coordinates of complex **1**

|    |        |         |         |
|----|--------|---------|---------|
| Co | 4.9573 | 8.5484  | 10.1349 |
| S  | 6.5172 | 7.9017  | 11.5715 |
| S  | 4.5891 | 6.4418  | 9.5879  |
| O  | 5.0665 | 10.3954 | 10.7476 |
| O  | 3.7921 | 9.2497  | 8.7272  |
| N  | 3.4737 | 8.4565  | 11.2725 |

|   |         |         |         |
|---|---------|---------|---------|
| N | 6.3058  | 8.7772  | 8.8631  |
| C | 1.9726  | 6.9817  | 12.6092 |
| H | 1.6595  | 7.6867  | 13.1297 |
| C | 7.7591  | 7.6943  | 10.3798 |
| C | 2.9166  | 7.2225  | 11.5967 |
| C | 2.9579  | 9.6918  | 11.5149 |
| C | 3.9097  | 10.7391 | 11.2301 |
| C | 3.4198  | 6.1409  | 10.8445 |
| C | 7.5446  | 8.1537  | 9.0607  |
| C | 2.4243  | 10.9288 | 6.759   |
| C | 1.5133  | 5.7059  | 12.8313 |
| H | 0.8802  | 5.5496  | 13.4949 |
| C | 9.9331  | 6.9129  | 9.6998  |
| H | 10.7522 | 6.5282  | 9.9164  |
| C | 1.3014  | 11.3239 | 12.1172 |
| C | 4.5951  | 13.2157 | 11.2151 |
| C | 3.5688  | 12.1057 | 11.4836 |
| C | 4.5119  | 9.8535  | 7.8451  |
| C | 3.9442  | 10.6943 | 6.8299  |
| C | 8.9958  | 7.0839  | 10.6755 |
| H | 9.1739  | 6.7963  | 11.5422 |
| C | 5.9508  | 9.6239  | 7.8683  |
| C | 1.6481  | 10.0228 | 11.9224 |
| H | 1.0206  | 9.3496  | 12.0573 |
| C | 8.5049  | 7.9248  | 8.0577  |
| H | 8.3413  | 8.1899  | 7.1815  |
| C | 6.7911  | 10.3152 | 6.9662  |
| H | 7.7133  | 10.2076 | 7.0125  |
| C | 6.2511  | 11.1382 | 6.0314  |
| C | 4.8286  | 11.2906 | 5.9796  |
| H | 4.48    | 11.8378 | 5.3132  |
| C | 2.9263  | 4.855   | 11.0993 |
| H | 3.2392  | 4.1338  | 10.6019 |
| C | 2.2918  | 12.3328 | 11.9115 |
| H | 2.0478  | 13.2139 | 12.0818 |
| C | 9.6878  | 7.3057  | 8.3861  |
| H | 10.327  | 7.1493  | 7.7293  |
| C | 1.9874  | 4.6512  | 12.0723 |
| H | 1.6633  | 3.7933  | 12.2262 |
| C | 1.7347  | 9.585   | 6.4988  |
| H | 2.0267  | 9.2329  | 5.6553  |
| H | 0.7829  | 9.7123  | 6.4797  |
| H | 1.961   | 8.9676  | 7.1978  |
| C | 5.0582  | 13.1982 | 9.7584  |
| H | 5.4765  | 12.3553 | 9.5662  |

|   |          |          |          |
|---|----------|----------|----------|
| H | 5.6881   | 13.9076  | 9.6126   |
| H | 4.3015   | 13.3179  | 9.1806   |
| C | 5.7977   | 13.0227  | 12.1458  |
| H | 5.5052   | 13.0665  | 13.0602  |
| H | 6.4437   | 13.7146  | 11.9837  |
| H | 6.1979   | 12.1665  | 11.9796  |
| C | 7.0851   | 11.9591  | 5.0434   |
| C | 2.0692   | 11.8898  | 5.6185   |
| H | 2.4771   | 12.7444  | 5.782    |
| H | 1.1163   | 11.9933  | 5.5721   |
| H | 2.3942   | 11.5345  | 4.7886   |
| C | 8.5848   | 11.7713  | 5.2805   |
| H | 8.824    | 12.1458  | 6.1308   |
| H | 9.0761   | 12.2154  | 4.5855   |
| H | 8.7949   | 10.8342  | 5.2723   |
| C | 4.0026   | 14.6059  | 11.4945  |
| H | 3.2533   | 14.7569  | 10.914   |
| H | 4.6706   | 15.2775  | 11.335   |
| H | 3.7137   | 14.6538  | 12.4088  |
| C | 1.8978   | 11.5305  | 8.0591   |
| H | 2.0617   | 10.9216  | 8.7827   |
| H | 0.9528   | 11.6864  | 7.9787   |
| H | 2.3458   | 12.3611  | 8.2308   |
| C | 6.7534   | 13.4538  | 5.2301   |
| H | 5.8226   | 13.6014  | 5.0461   |
| H | 7.2854   | 13.9778  | 4.625    |
| H | 6.9466   | 13.7157  | 6.1336   |
| C | 6.7626   | 11.4998  | 3.6248   |
| H | 6.9528   | 10.5616  | 3.5403   |
| H | 7.299    | 11.9923  | 2.9993   |
| H | 5.8337   | 11.6542  | 3.4408   |
| C | -0.12762 | 11.70094 | 12.55004 |
| C | -0.36884 | 13.16181 | 12.26864 |
| C | -0.31339 | 11.37391 | 14.00948 |
| H | -0.22538 | 13.37848 | 11.18269 |
| H | -1.41008 | 13.45036 | 12.55152 |
| H | 0.34042  | 13.7974  | 12.85208 |
| H | -0.12955 | 10.28781 | 14.19214 |
| H | 0.39743  | 11.96284 | 14.63829 |
| H | -1.35318 | 11.61596 | 14.33773 |
| C | -1.09394 | 10.84927 | 11.70596 |
| H | -0.84507 | 10.94863 | 10.67006 |
| H | -1.01078 | 9.82265  | 11.99587 |
| H | -2.09738 | 11.18477 | 11.86548 |

**Table S6:** Optimized coordinates of complex **2**

|    |          |          |          |
|----|----------|----------|----------|
| Mn | 0.00296  | 1.34088  | 0.00823  |
| S  | 0.01148  | 2.88797  | 1.71796  |
| S  | 0.01717  | 2.87855  | -1.70966 |
| O  | -0.38534 | -0.0662  | 1.26683  |
| O  | 0.36806  | -0.08841 | -1.23406 |
| N  | 1.92056  | 1.30001  | 0.22695  |
| N  | -1.91558 | 1.3187   | -0.22    |
| C  | 2.57097  | 2.3534   | 0.85946  |
| C  | 3.94218  | 2.65879  | 0.7155   |
| H  | 4.55115  | 2.0778   | 0.03412  |
| C  | 2.47766  | 0.14338  | -0.24851 |
| C  | 1.56581  | -0.59092 | -1.08679 |
| C  | 3.75777  | -0.38471 | 0.0498   |
| H  | 4.38279  | 0.12993  | 0.76427  |
| C  | 1.73988  | 3.20421  | 1.642    |
| C  | 3.26598  | -2.23254 | -1.42335 |
| H  | 3.60761  | -3.15631 | -1.87123 |
| C  | -2.55271 | 2.36917  | -0.86744 |
| C  | 2.32397  | 4.27205  | 2.33833  |
| H  | 1.69391  | 4.9106   | 2.94911  |
| C  | 5.50955  | -2.24299 | -0.20029 |
| C  | 4.15997  | -1.57397 | -0.52524 |
| C  | 4.49178  | 3.73428  | 1.39633  |
| H  | 5.54454  | 3.96716  | 1.27263  |
| C  | 1.98729  | -1.79439 | -1.72566 |
| C  | -2.48262 | 0.16621  | 0.25434  |
| C  | -1.70865 | 3.21064  | -1.64662 |
| C  | -1.58275 | -0.56684 | 1.10637  |
| C  | 6.39264  | -1.37366 | 0.714    |
| H  | 6.59165  | -0.39406 | 0.26462  |
| H  | 7.35443  | -1.87053 | 0.88098  |
| H  | 5.9332   | -1.21785 | 1.69593  |
| C  | 3.68615  | 4.52788  | 2.22771  |
| H  | 4.12111  | 5.36364  | 2.76776  |
| C  | -2.01217 | -1.7689  | 1.742    |
| C  | -3.75707 | -0.36399 | -0.06072 |
| H  | -4.3755  | 0.14885  | -0.78153 |
| C  | 1.04512  | -2.53352 | -2.69323 |
| C  | -4.45983 | 3.75774  | -1.43203 |
| H  | -5.51252 | 3.99723  | -1.32112 |
| C  | 1.70398  | -3.79436 | -3.28846 |
| H  | 2.6218   | -3.55715 | -3.83814 |

|   |          |          |          |
|---|----------|----------|----------|
| H | 1.00944  | -4.26748 | -3.99096 |
| H | 1.94305  | -4.53351 | -2.51508 |
| C | -2.27863 | 4.27952  | -2.35369 |
| H | -1.63804 | 4.91122  | -2.96103 |
| C | -0.24182 | -2.97544 | -1.95309 |
| H | -0.00057 | -3.67361 | -1.14521 |
| H | -0.91596 | -3.48516 | -2.65216 |
| H | -0.77001 | -2.12302 | -1.52396 |
| C | -3.2844  | -2.21218 | 1.42016  |
| H | -3.63457 | -3.13049 | 1.87281  |
| C | -3.9239  | 2.68274  | -0.73954 |
| H | -4.54195 | 2.1111   | -0.05832 |
| C | 6.29953  | -2.50163 | -1.50657 |
| H | 5.7729   | -3.17625 | -2.18771 |
| H | 7.26699  | -2.9606  | -1.2723  |
| H | 6.48618  | -1.56281 | -2.03921 |
| C | -4.16333 | -1.55607 | 0.50722  |
| C | 0.67726  | -1.58301 | -3.85993 |
| H | 0.17872  | -0.68325 | -3.4952  |
| H | 0.00403  | -2.09504 | -4.55793 |
| H | 1.57517  | -1.28239 | -4.41188 |
| C | -3.64021 | 4.54427  | -2.25675 |
| H | -4.06519 | 5.37993  | -2.80463 |
| C | -1.07898 | -2.50677 | 2.718    |
| C | -0.724   | -1.56652 | 3.89758  |
| H | -0.21977 | -0.66343 | 3.55067  |
| H | -0.06387 | -2.08712 | 4.60174  |
| H | -1.62975 | -1.26978 | 4.43894  |
| C | 5.24138  | -3.5889  | 0.51744  |
| H | 4.69518  | -3.42308 | 1.45214  |
| H | 6.18649  | -4.09185 | 0.75548  |
| H | 4.64488  | -4.26599 | -0.10307 |
| C | -5.51366 | -2.2188  | 0.17777  |
| C | 0.21276  | -2.93909 | 1.98044  |
| H | -0.02395 | -3.64577 | 1.17851  |
| H | 0.89423  | -3.43663 | 2.68149  |
| H | 0.73121  | -2.08305 | 1.54553  |
| C | -1.74079 | -3.77176 | 3.29961  |
| H | -2.66109 | -3.53523 | 3.84588  |
| H | -1.0496  | -4.24985 | 4.00228  |
| H | -1.97654 | -4.50573 | 2.52054  |
| C | -6.30339 | -2.46329 | 1.48644  |
| H | -7.26583 | -2.93708 | 1.26168  |
| H | -6.50041 | -1.51881 | 2.00517  |
| H | -5.7652  | -3.12055 | 2.17621  |

|   |          |          |          |
|---|----------|----------|----------|
| C | -5.25087 | -3.57212 | -0.52731 |
| H | -4.67642 | -4.25344 | 0.10853  |
| H | -4.68888 | -3.42297 | -1.45543 |
| H | -6.19969 | -4.06297 | -0.7745  |
| C | -6.38466 | -1.34918 | -0.74888 |
| H | -5.90296 | -1.17769 | -1.71752 |
| H | -6.60689 | -0.37611 | -0.29633 |
| H | -7.33767 | -1.85365 | -0.94044 |

**Table S7:** Mulliken charges (I) and spin densities (II) of complex **1** for doublet state.

| Atom | I         | II        |
|------|-----------|-----------|
| Co1  | 0.317071  | -0.020959 |
| S1   | 0.109577  | 0.466437  |
| S2   | -0.018513 | 0.238994  |
| O2   | -0.369388 | 0.153318  |
| O1   | -0.330643 | -0.160672 |
| N2   | -0.261669 | 0.370259  |
| N1   | -0.245447 | -0.182056 |
| C40  | -0.050271 | 0.099027  |
| C20  | -0.099535 | -0.130399 |
| C35  | 0.181242  | -0.079796 |
| C21  | 0.145025  | 0.006883  |
| C22  | 0.196275  | 0.169242  |
| C36  | -0.072948 | 0.088811  |
| C15  | 0.193342  | 0.153209  |
| C7   | -0.329390 | 0.002337  |
| C39  | -0.003268 | -0.036893 |
| C18  | 0.023522  | -0.118341 |
| C25  | 0.104698  | 0.031685  |
| C27  | -0.327039 | 0.000776  |
| C23  | 0.024568  | -0.037650 |
| C2   | 0.207666  | -0.123714 |
| C3   | 0.018690  | -0.008598 |
| C19  | 0.014674  | 0.115833  |
| C1   | 0.158927  | -0.113494 |
| C26  | -0.150083 | 0.042028  |
| C16  | -0.039227 | -0.132431 |
| C6   | -0.145468 | 0.055169  |
| C5   | 0.103356  | -0.120526 |
| C4   | -0.098226 | -0.055658 |
| C37  | -0.024348 | -0.041029 |

|     |           |           |
|-----|-----------|-----------|
| C24 | -0.112440 | 0.130702  |
| C17 | 0.016478  | 0.137649  |
| C38 | 0.018858  | 0.099024  |
| C8  | 0.130047  | -0.000177 |
| C30 | 0.120834  | -0.000070 |
| C28 | 0.120165  | -0.000187 |
| C11 | -0.355991 | 0.009647  |
| C10 | 0.129162  | 0.000323  |
| C12 | 0.145248  | 0.000061  |
| C29 | 0.127438  | -0.000395 |
| C9  | 0.135120  | -0.000941 |
| C13 | 0.130450  | -0.004803 |
| C14 | 0.126288  | -0.005034 |
| C31 | -0.353348 | -0.002078 |
| C34 | 0.141484  | 0.001103  |
| C32 | 0.116740  | 0.001579  |
| C33 | 0.130298  | 0.001806  |

**Table S8:** Mulliken charges (I) and spin densities (II) of complex **1** for the quartet state:

| Atom | I         | II        |
|------|-----------|-----------|
| Co1  | 0.242033  | 0.216992  |
| S1   | 0.075238  | 0.273767  |
| S2   | 0.072496  | 0.265556  |
| O2   | -0.329579 | 0.212708  |
| O1   | -0.330780 | 0.211086  |
| N2   | -0.275863 | 0.306777  |
| N1   | -0.277151 | 0.305461  |
| C40  | -0.047498 | 0.059084  |
| C20  | -0.086388 | 0.064648  |
| C35  | 0.196871  | -0.026550 |
| C21  | 0.169928  | 0.084025  |
| C22  | 0.187490  | 0.149428  |
| C36  | -0.085367 | 0.067172  |
| C15  | 0.198376  | -0.025121 |
| C7   | -0.329921 | -0.002493 |
| C39  | 0.005711  | 0.005385  |
| C18  | 0.018671  | 0.068052  |
| C25  | 0.113056  | 0.129195  |
| C27  | -0.332464 | -0.003901 |
| C23  | 0.035056  | 0.026532  |
| C40  | 0.188680  | 0.156712  |
| C3   | 0.020210  | 0.006511  |



C19 -0.013689 -0.011167  
C1 0.186665 0.092785  
C26 -0.158271 -0.022105  
C16 -0.047312 0.058033  
C6 -0.156882 -0.023884  
C5 0.109176 0.123380  
C4 -0.109062 0.086903  
C37 -0.014575 -0.013750  
C24 -0.110992 0.074938  
C17 0.006264 0.007597  
C38 0.019106 0.070062  
C8 0.127934 0.002380  
C30 0.129329 -0.000015  
C28 0.127286 0.002949  
C11 -0.356643 -0.010218  
C10 0.128359 -0.000258  
C12 0.146256 -0.000089  
C29 0.130083 -0.000221  
C9 0.129518 -0.000483  
C13 0.128673 0.005413  
C14 0.125120 0.005657  
C31 -0.358492 -0.009229  
C34 0.146771 0.001345  
C32 0.121548 0.004059  
C33 0.135026 0.004896
